# Supplementary material for: A patient-derived stem cell model of hereditary spastic paraplegia with SPAST mutations
Source: PubMed Central journal article supplement — Dis Model Mech. 2012 Dec 20;6(2):489–502. doi: 10.1242/dmm.010884 (PMC3597030; doi:10.1242/dmm.010884), 2012-12-20
Supplement: supp_010884_DMM010884.pdf [file supp_010884_DMM010884.pdf]

## Supplementary Figure 1

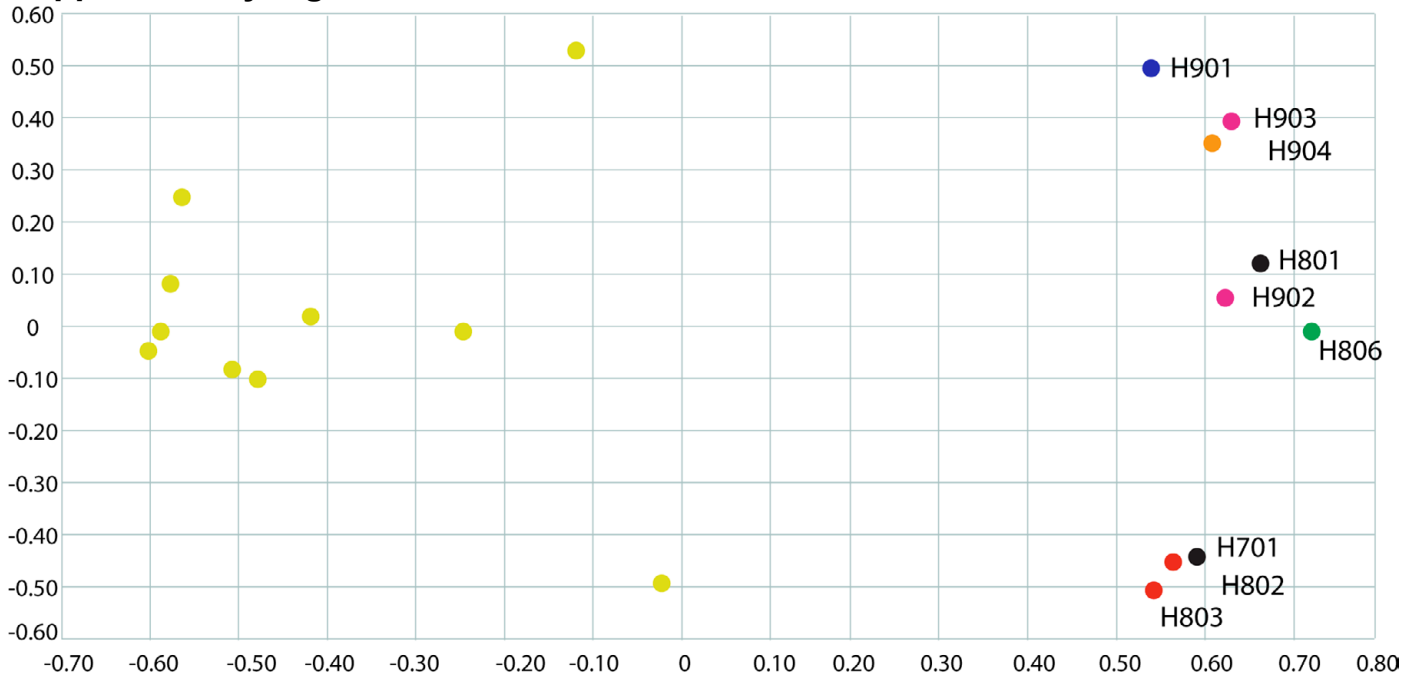

- Exon 2
- Exon 3
- Exon 7
- Exon 8/9
- Exon 11
- Exon 17
- Controls

| Short ID | Exon/Intron | Nucleotide change† |
|----------|-------------|--------------------|
| H701     | 11          | c.1413+3_1413+6del |
| H801     | 11          | c.1392 A>T         |
| H802     | 3           | c.583C>G           |
| H803     | 3           | c.583C>G           |
| H806     | 7           | c.1096G>A          |
| H901     | 2           | c.444G>A           |
| H902     | 17          | c.1789A>G          |
| H903     | 17          | c.1789A>G          |
| H904     | 8-9         | SPG4Ex del 8-9     |

### Principal Component Analysis demonstrates Group and Individual Differences

The x-axis shows that the primary component, which accounts for 34% of the variance in the gene expression data, separates the cells into two groups, Patients to the right and Controls to the left. The y-axis shows that Patients and Controls are distributed over the same range of the secondary component, which accounts for 19% of the variance in the data. The type of mutation in each of the Patients is indicated by the colour of the dot and the Table. The secondary component did not reliably separate the Patients according to specific mutations.

## Supplementary Figure 2

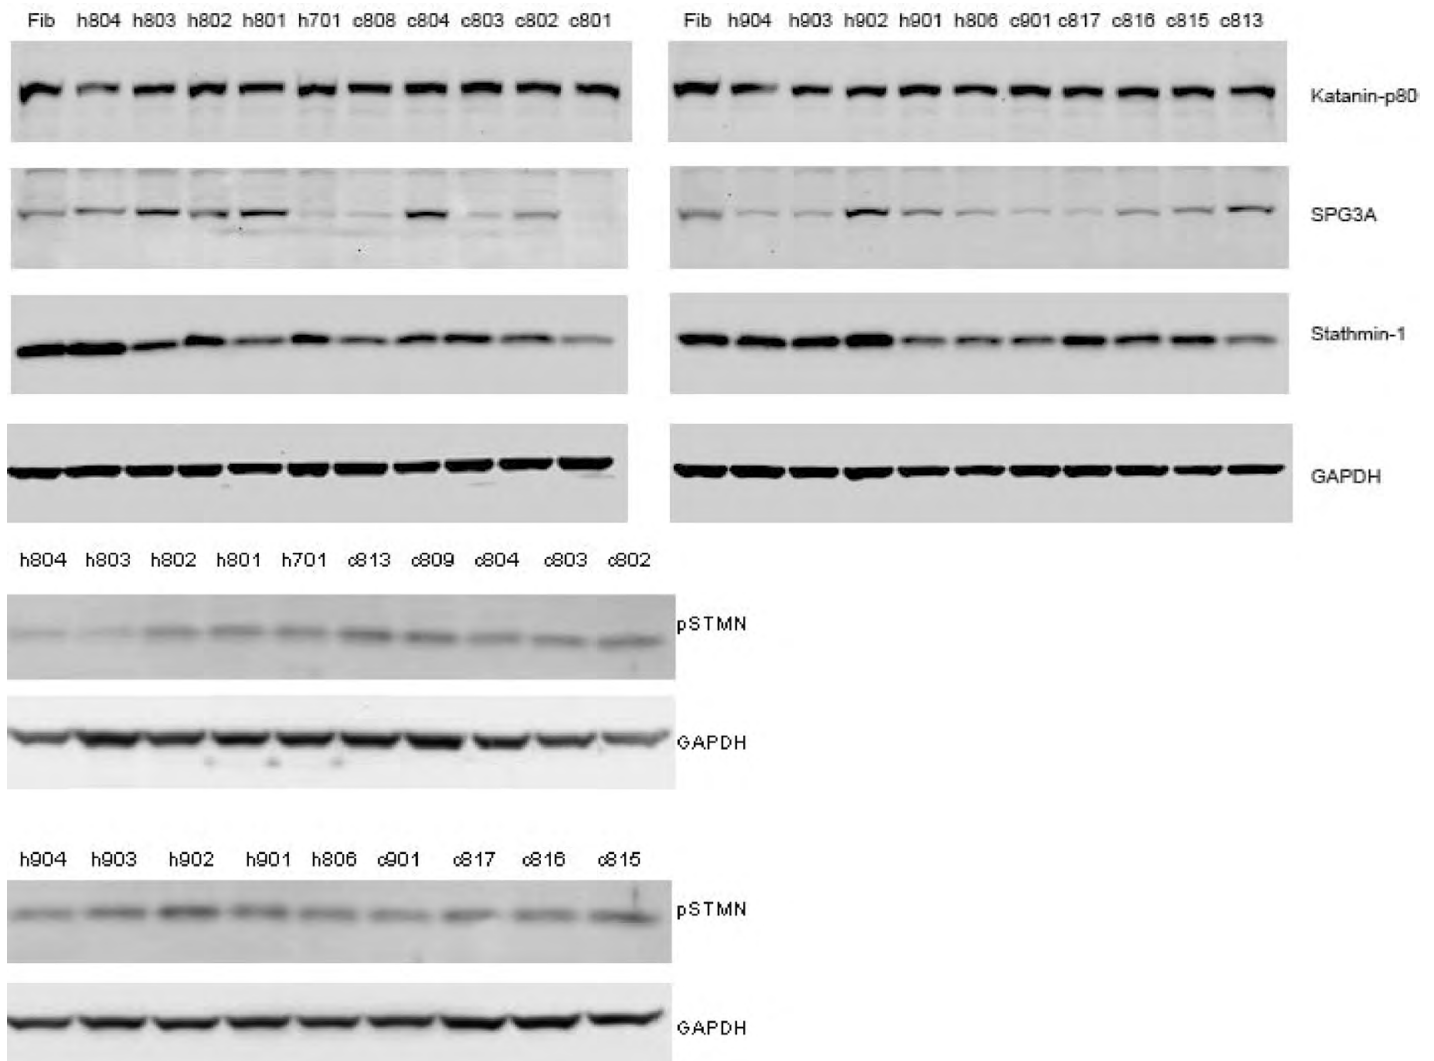

Immunoblots showing expression of proteins indicated in 10 Patients (Columns labelled “h”) and 10 Controls (Columns labelled “c”) (HSP: 5 left columns) and 10 Control. Columns labelled “Fib” are positive controls using protein from fibroblasts. Columns labelled “h804” are from a patient without an identified SPAST mutation. These were not included in any analyses. These data are summarised in Figure 3.

### Supplementary Figure 3

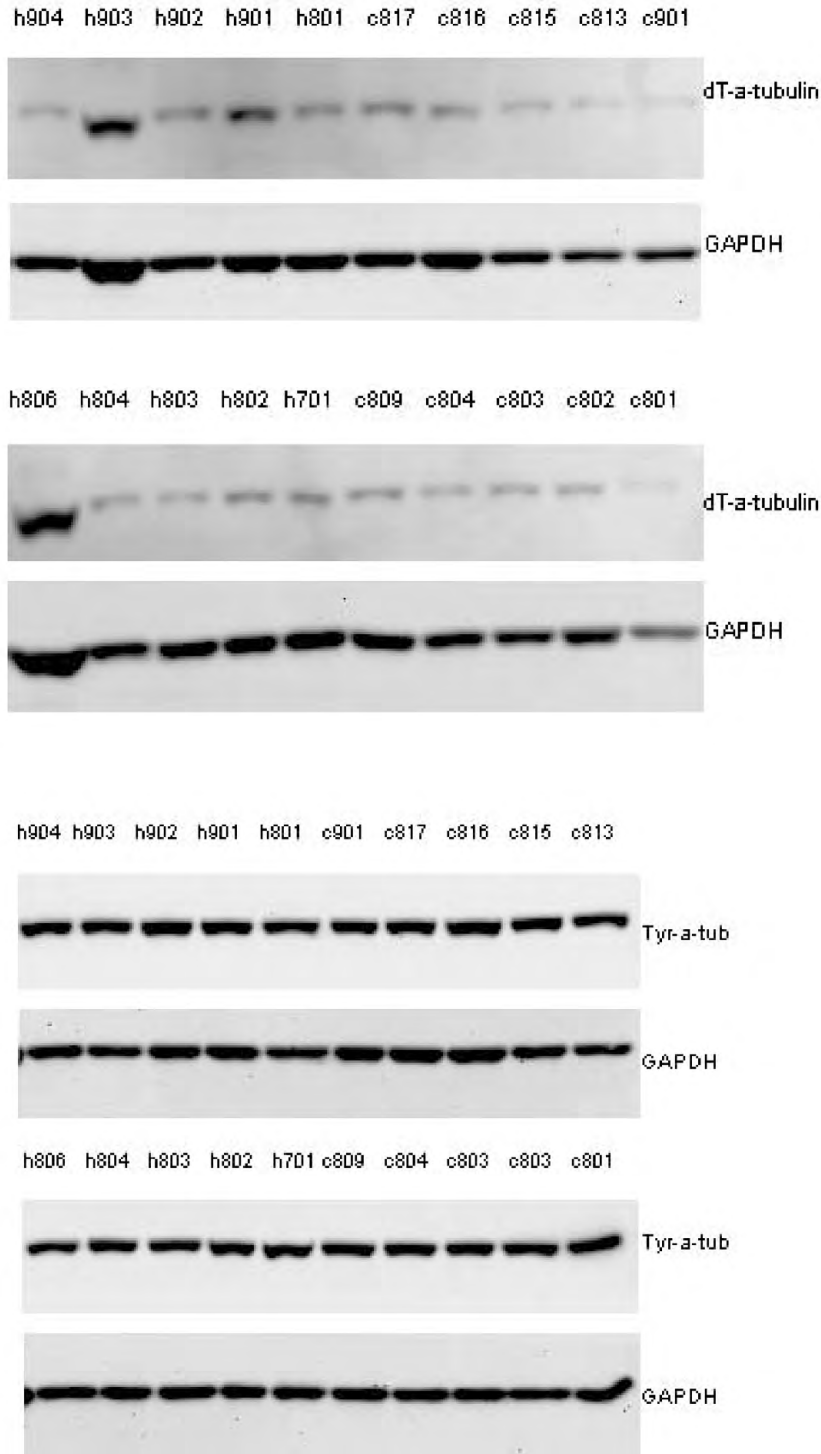

Immunoblots showing expression of de-tyrosinated  $\alpha$ -tubulin (dT-a-tubulin) and tyrosinated  $\alpha$ -tubulin (Tyr-a-tub) and GAPDH loading controls in 10 Patients (Columns labelled “h”) and 10 Controls (Columns labelled “c”) (HSP: 5 left columns) and 10 Control. Columns labelled “h804” are from a patient without an identified SPAST mutation. These were not included in any analyses. These data are summarised in Figure 3.

## Supplementary Figure 4

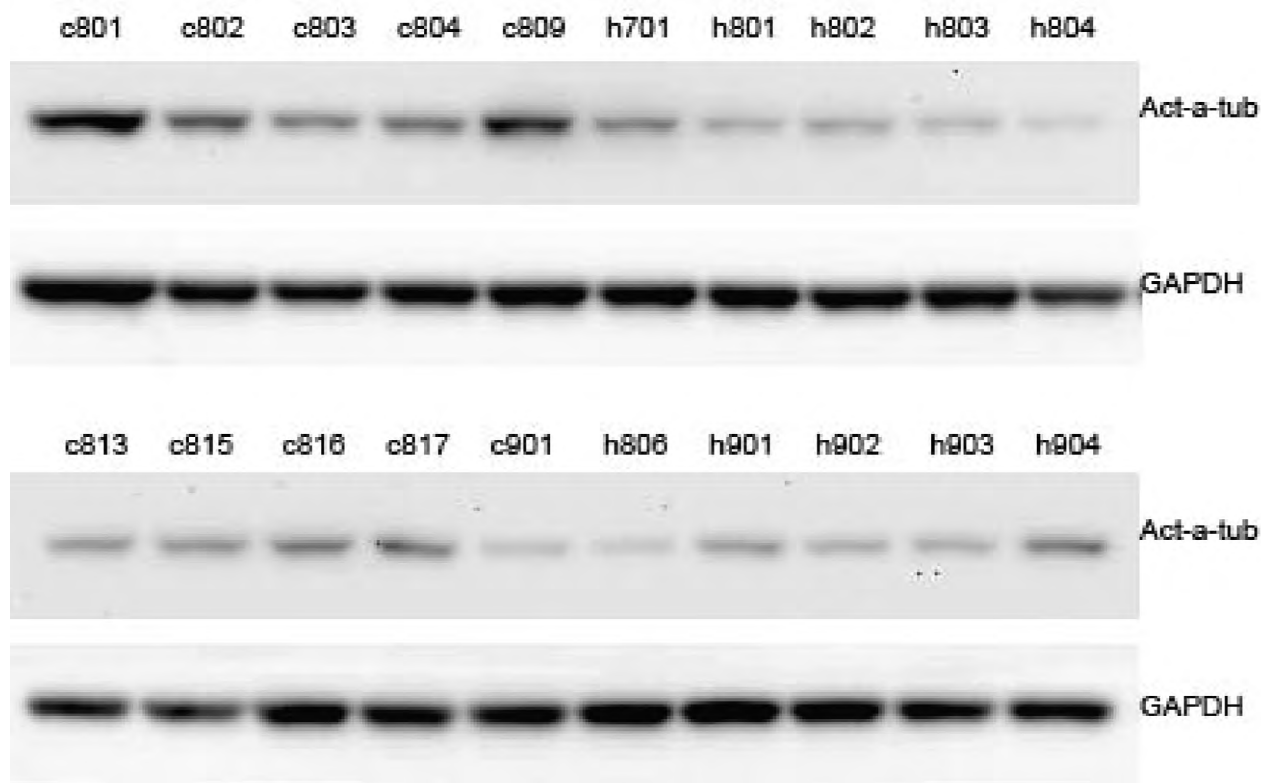

Immunoblots showing expression of acetylated  $\alpha$ -tubulin (Act-a-tub) and GAPDH loading controls in 10 Patients (Columns labelled “h”) and 10 Controls (Columns labelled “c”) (HSP: 5 right columns) and 10 Control. The column labelled “h804” is from a patient without an identified SPAST mutation and was not included in any analyses. These data are summarised in Figure 3.

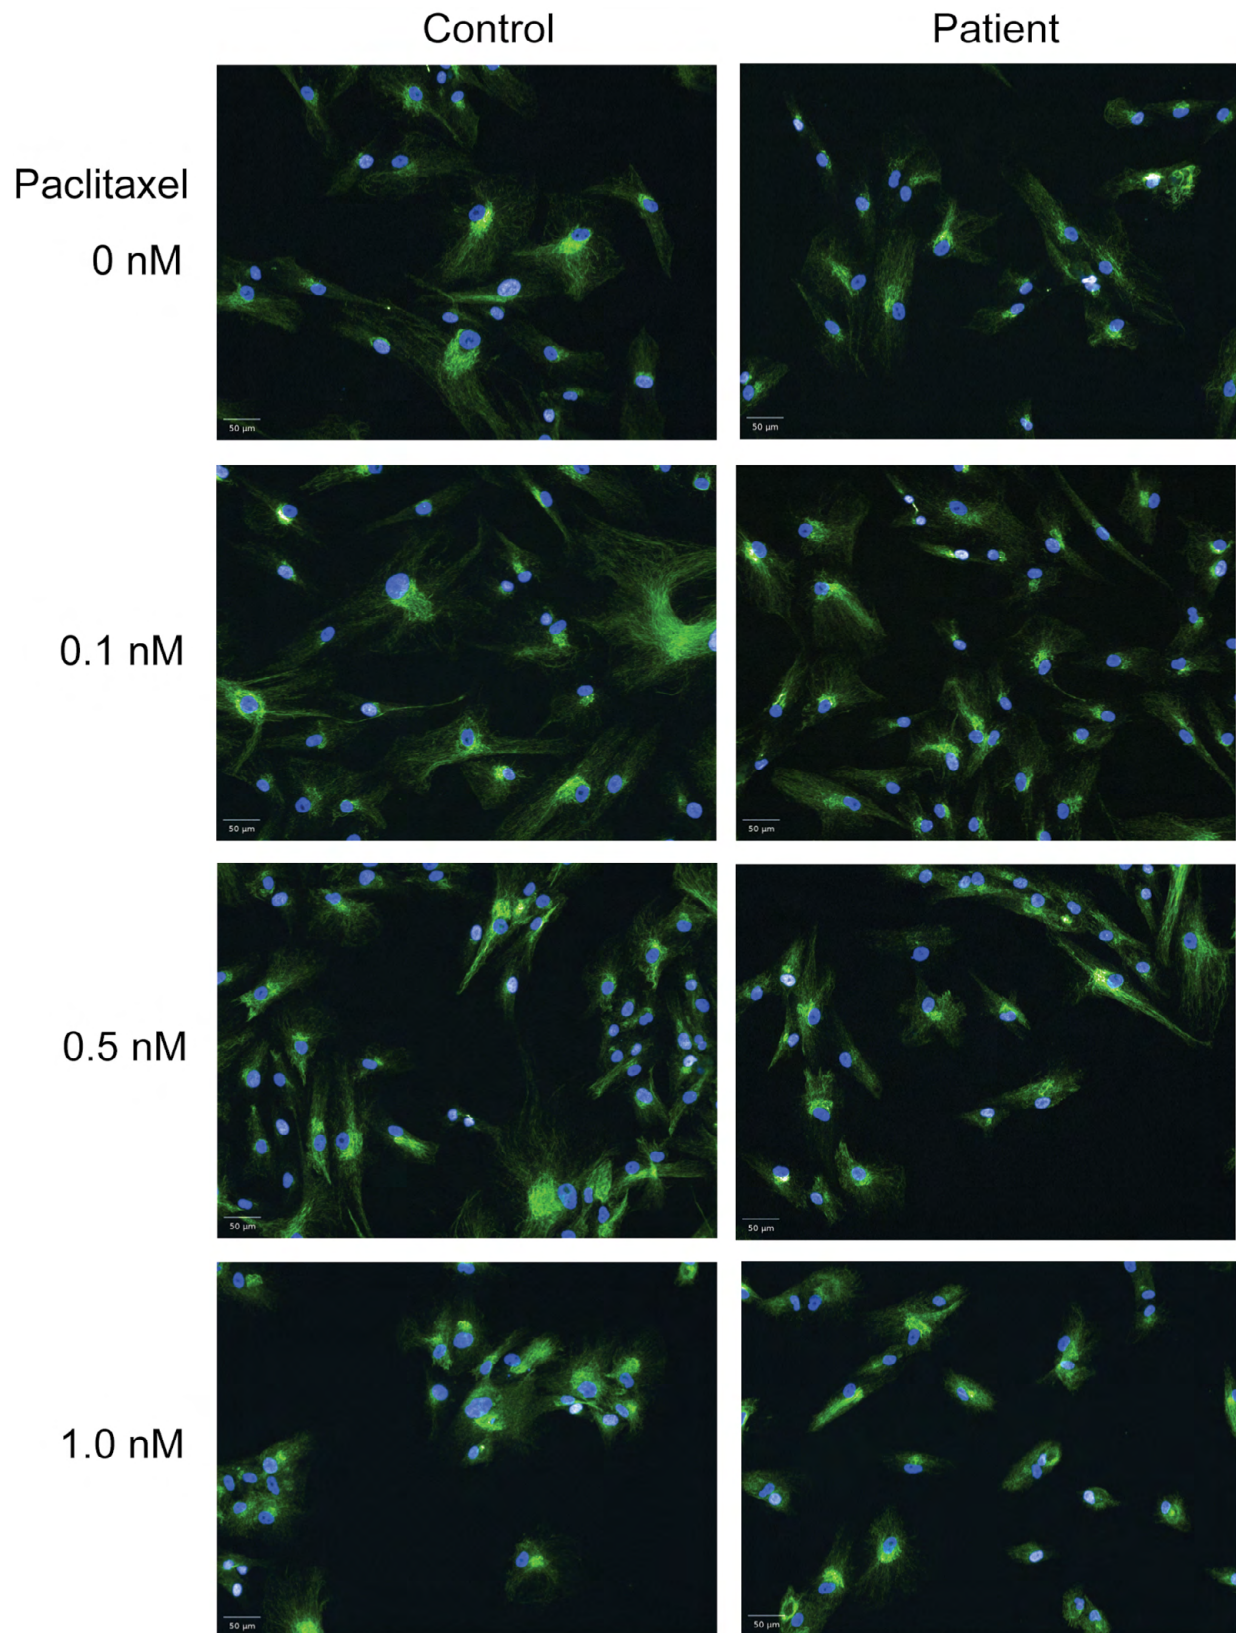

Examples of images used in the automated image analysis showing acetylated  $\alpha$ -tubulin immunofluorescence (green) and labelled nuclei (blue) in a Control and a Patient cell line at the indicated doses of paclitaxel.

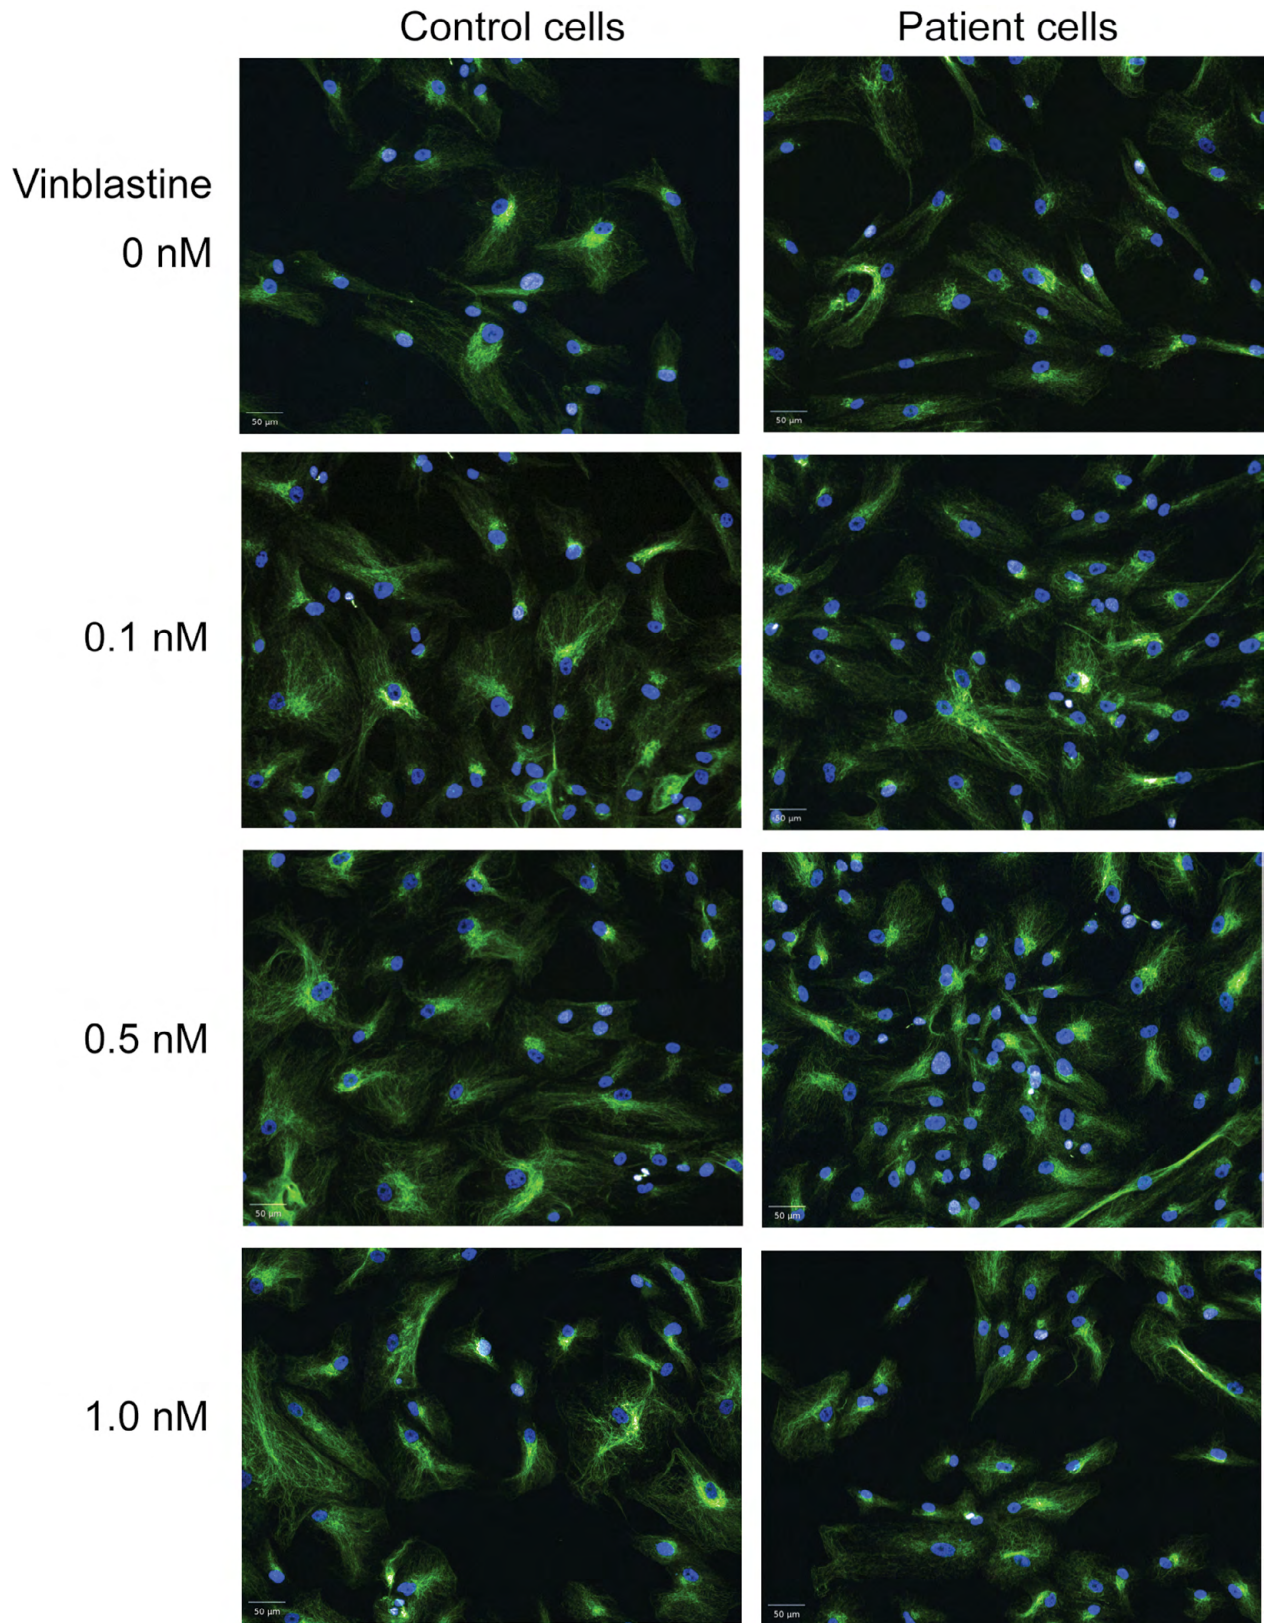

Examples of images used in the automated image analysis showing acetylated  $\alpha$ -tubulin immunofluorescence (green) and labelled nuclei (blue) in a Control and a Patient cell line at the indicated doses of vinblastine.

**Supplementary Table 4****GenBank  
accession**

| <b>number</b> | <b>Gene</b> | <b>Forward primer</b>  | <b>Reverse primer</b>    | <b>Annealing<br/>Temp (°C)</b> | <b>Product<br/>size (bp)</b> |
|---------------|-------------|------------------------|--------------------------|--------------------------------|------------------------------|
| NM_181598     | SPG3A       | TTTACAGTGCAGCAGCAACC   | TGATTGTTCAGTAGATTCCGACTT | 59                             | 80                           |
| NM_005563     | STMN1       | GGTCACGTGCCTCTGTTTG    | GCCTGACCACACTCTGAGC      | 59                             | 68                           |
| NM_007044     | KATNA1      | GCGGACATTACCAACGTGT    | CATGTGCATTTCTTCTTTGGAA   | 59                             | 111                          |
| NM_001014380  | KATNAL1     | CAAACCTGGAAAAACATCACA  | ATGTTAACTGGGGGCCACTC     | 59                             | 96                           |
| NM_005886     | KATNB1      | GGAGGAGGTGATGCTGGTC    | GAAGCAACAGTTGGGCAAAG     | 59                             | 99                           |
| NM_031303     | KATNAL2     | CAGACTGGCAAAGAGAGTTCCG | TCTTTGTGGTTGCCTTTGTG     | 59                             | 75                           |
